# Supplementary material for: Facile synthesis and characterization of beta lactoglobulin–copper nanocomposites having antibacterial applications
Source: Royal Society of Chemistry journal article supplement (doi:10.1039/c6ra14162e), 2016-01-01
Supplement: c6ra14162e1.pdf [file c6ra14162e1.pdf]

### UV- STUDY:

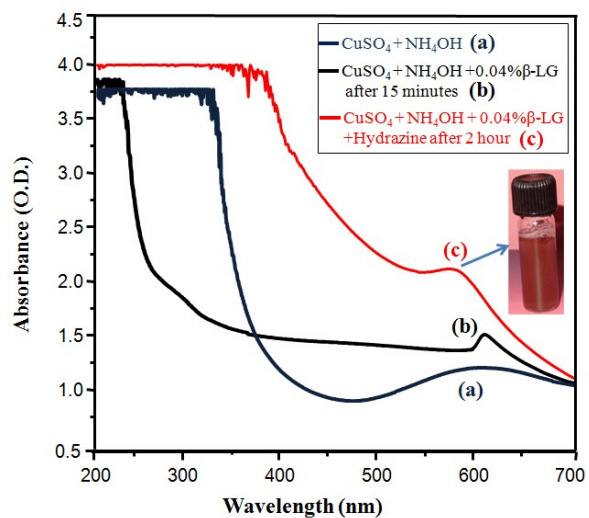

**Fig. 1** UV visible spectra of  $\text{CuSO}_4 + \text{NH}_4\text{OH}$ (a),  $\text{CuSO}_4 + \text{NH}_4\text{OH} + 0.04\% \beta\text{-lg}$  after 15 minutes(b),  $\text{CuSO}_4 + \text{NH}_4\text{OH} + 0.04\% \beta\text{-lg} + \text{Hydrazine}$  after 2 hour(c)

### X-RAY DIFFRACTION:

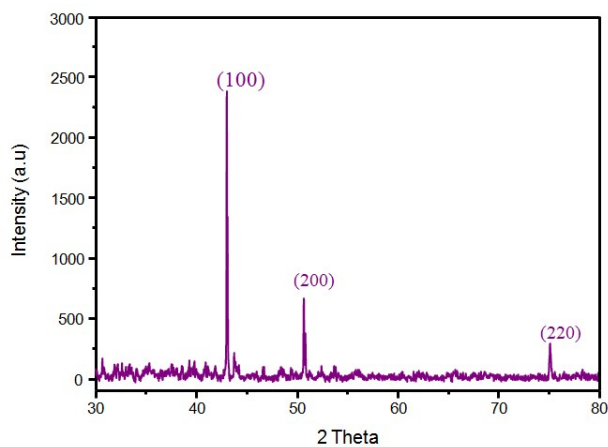

**Fig. 2** XRD patterns of synthesized Cu nano particles at 25°C showing three types of planes (100), (200) and (220)

**FOURIER TRANSFORM-INFRARED SPECTROSCOPY:**

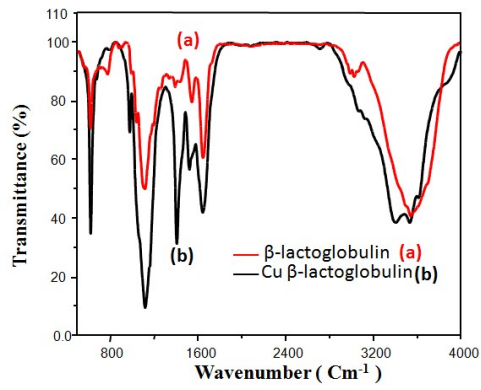

**Fig. 3** FTIR spectra of pure  $\beta$ -lg [curve (a)] and Cu  $\beta$ -lg nanocomposite [ curve (b) ]

**FE-SEM:**

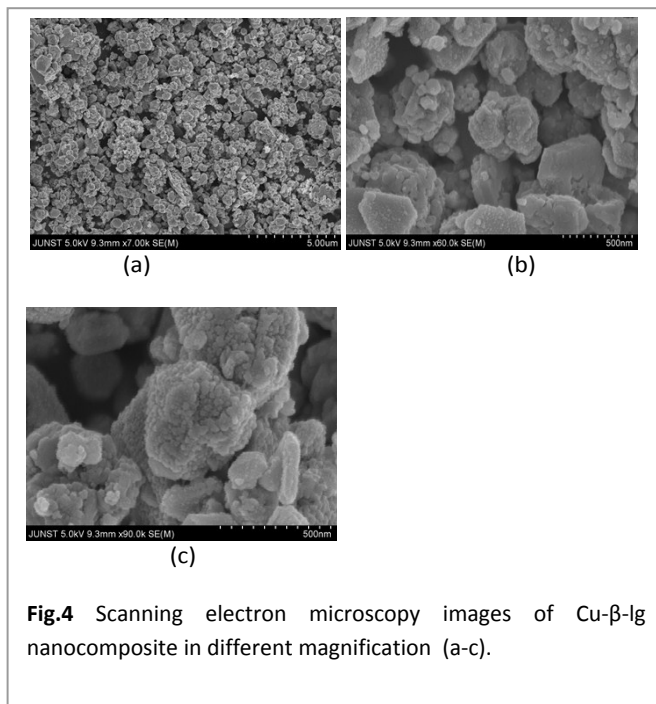

**Fig.4** Scanning electron microscopy images of Cu- $\beta$ -lg nanocomposite in different magnification (a-c).

TEM :

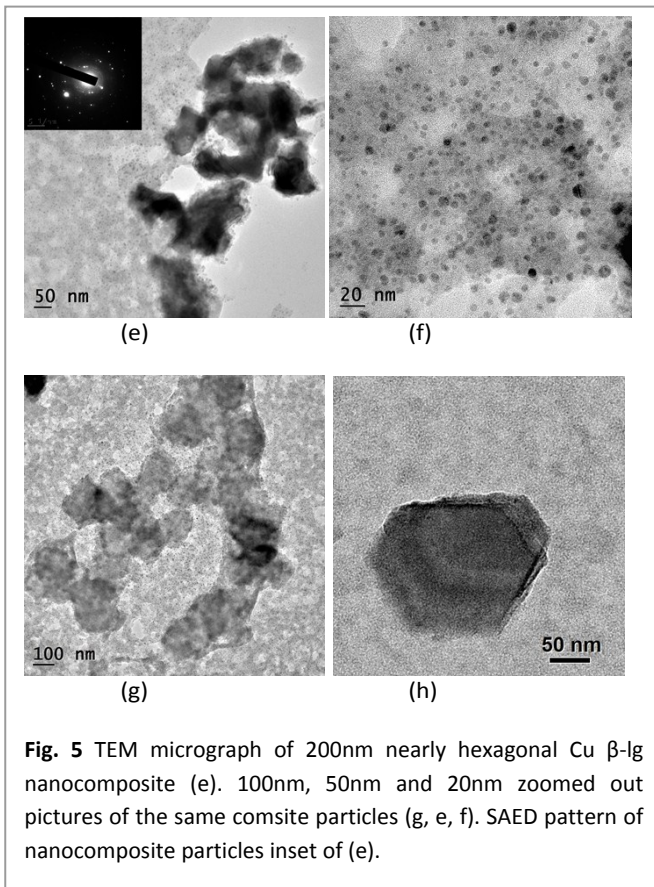

**Fig. 5** TEM micrograph of 200nm nearly hexagonal Cu  $\beta$ -Ig nanocomposite (e). 100nm, 50nm and 20nm zoomed out pictures of the same comsite particles (g, e, f). SAED pattern of nanocomposite particles inset of (e).

**DOCKING STUDY:**

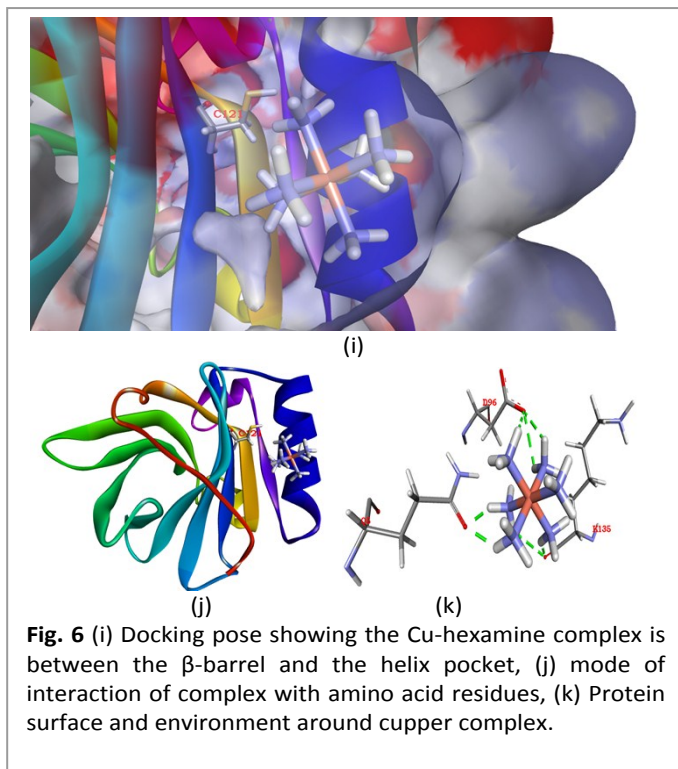

**Possible mechanism:**

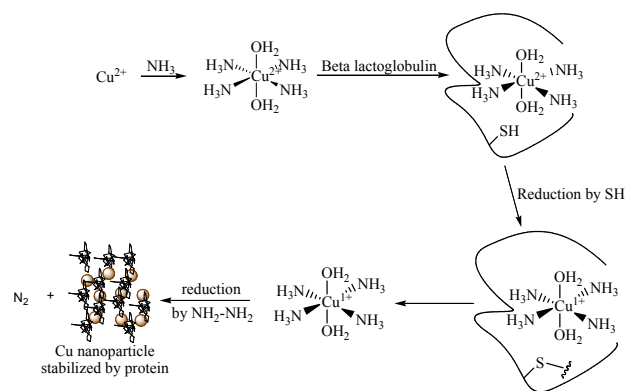

**Fig. 7** Possible mechanism of synthesis of Cu  $\beta$ -Ig-nanocomposite
